# Supplementary material for: Adherence to the Mediterranean Diet and Incidence of Pre-Frailty and Frailty in Community-Dwelling Adults 70+: The 3-Year DO-HEALTH Study
Source: MDPI journal article supplement (doi:10.3390/nu14194145), 2022-10-06
Supplement: s1 [file s1]

## SUPPLEMENTARY MATERIAL

**Stephanie Gängler <sup>1,2,†</sup>, Hanna Steiner <sup>1,3,†</sup>, Michael Gagesch <sup>1,2</sup>, Sophie Guyonnet <sup>4,5</sup>, E. John Orav <sup>6</sup>, Arnold von Eckardstein <sup>7</sup>, Walter C. Willett <sup>8,9</sup> and Heike A. Bischoff-Ferrari <sup>1,2,3,\*</sup>**

<sup>1</sup> Center on Aging and Mobility, University Hospital Zurich, Zurich City Hospital-Waid and University of Zurich, 8006 Zurich, Switzerland

<sup>2</sup> Department of Aging Medicine and Aging Research, University Hospital Zurich and University of Zurich, 8006 Zurich, Switzerland

<sup>3</sup> University Clinic for Aging Medicine, Zurich City Hospital-Waid, 8037 Zurich, Switzerland

<sup>4</sup> G rontop le de Toulouse, Institut du Vieillissement, Centre Hospitalo-Universitaire de Toulouse, 31059 Toulouse, France

<sup>5</sup> UMR INSERM 1027, University of Toulouse III, Toulouse 31059, France

<sup>6</sup> Department of Biostatistics, Harvard T.H. Chan School of Public Health, Boston, MA 02115, USA

<sup>7</sup> Institute for Clinical Chemistry, University Hospital Zurich, 8091 Zurich, Switzerland

<sup>8</sup> Department of Nutrition, Harvard T.H. Chan School of Public Health, Boston, MA 02115, USA

<sup>9</sup> Department of Epidemiology, Harvard T.H. Chan School of Public Health, Boston, MA 02115, USA

\* Correspondence: heike.bischoff@usz.ch

† These authors contributed equally to this work.

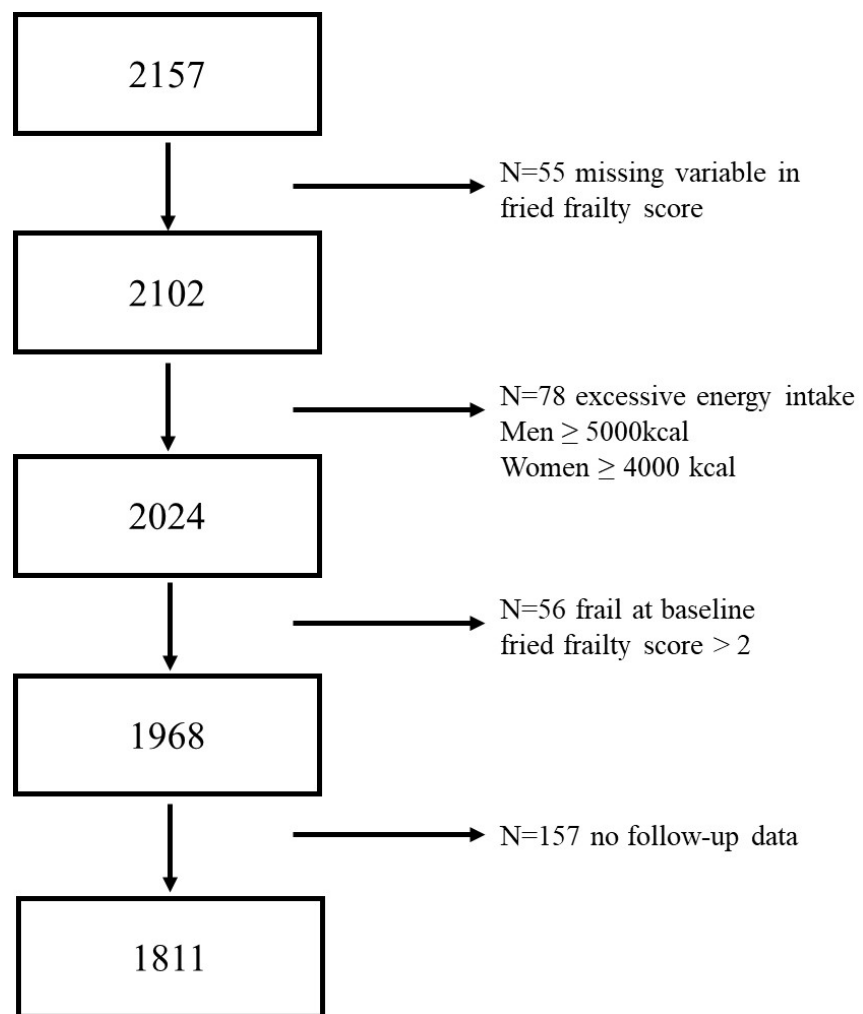

**Figure S1. Participant flowchart**

**Table S1. Baseline population characteristics of DO-HEALTH participants considered being robust at baseline**

| Characteristics                                                                                                                                                                                                                                                                                                               | Overall<br>(n = 1035) | 70-74 years<br>(n = 630) | ≥75 years<br>(n =405) | p-value |
|-------------------------------------------------------------------------------------------------------------------------------------------------------------------------------------------------------------------------------------------------------------------------------------------------------------------------------|-----------------------|--------------------------|-----------------------|---------|
| Age, mean (SD), years                                                                                                                                                                                                                                                                                                         | 74.41 (4.08)          | 71.78 (1.36)             | 78.49 (3.48)          | <0.001  |
| Women, No. (%)                                                                                                                                                                                                                                                                                                                | 575 (55.6)            | 353 (56.0)               | 222 (54.8)            | 0.749   |
| Education, mean (SD), year                                                                                                                                                                                                                                                                                                    | 13.28 (3.87)          | 13.64 (3.75)             | 12.73 (4.01)          | <0.001  |
| BMI, mean (SD) <sup>b</sup>                                                                                                                                                                                                                                                                                                   | 26.08 (3.97)          | 26.10 (4.14)             | 26.05 (3.71)          | 0.841   |
| MoCA score, median (IQR) <sup>c</sup> , (0-30) points                                                                                                                                                                                                                                                                         | 27.00 (25.00, 28.00)  | 27.00 (25.00, 29.00)     | 27.00 (24.00, 28.00)  | 0.004   |
| Sum of comorbidities, median (IQR)                                                                                                                                                                                                                                                                                            | 1.00 (0.00, 2.00)     | 1.00 (0.00, 2.00)        | 2.00 (1.00, 2.00)     | <0.001  |
| Physical activity volume, median (IQR), MET-h/week <sup>d</sup>                                                                                                                                                                                                                                                               | 30.00                 | 31.45 (16.42, 57.62)     | 27.46 (12.81, 51.01)  | 0.010   |
| Serum IL-6, median (IQR), ng/L                                                                                                                                                                                                                                                                                                | 2.30 (1.50, 3.70)     | 2.10 (1.50, 3.30)        | 2.60 (1.80, 3.92)     | <0.001  |
| Serum CRP, median (IQR), mg/L                                                                                                                                                                                                                                                                                                 | 1.40 (0.80, 2.70)     | 1.40 (0.80, 2.50)        | 1.60 (0.80, 2.90)     | 0.027   |
| Physical activity, N (%)                                                                                                                                                                                                                                                                                                      |                       |                          |                       | 0.102   |
| none                                                                                                                                                                                                                                                                                                                          | 118 (11.4)            | 65 (10.3)                | 53 (13.1)             |         |
| 1-2 times/week                                                                                                                                                                                                                                                                                                                | 327 (31.7)            | 190 (30.2)               | 137 (33.9)            |         |
| ≥3 times/week                                                                                                                                                                                                                                                                                                                 | 588 (56.9)            | 374 (59.5)               | 214 (53.0)            |         |
| Faller = Yes (%)                                                                                                                                                                                                                                                                                                              | 390 (37.7)            | 228 (36.2)               | 162 (40.0)            | 0.243   |
| MedDietScore, mean (SD), (0-55) points                                                                                                                                                                                                                                                                                        | 36.95 (4.85)          | 36.98 (4.72)             | 36.89 (5.06)          | 0.762   |
| Energy intake, median (IQR), kcal/day                                                                                                                                                                                                                                                                                         | 2428 (1950, 2927)     | 2411 (1932, 2915)        | 2434 (1958, 2947)     | 0.613   |
| Abbreviations: IQR, interquartile range                                                                                                                                                                                                                                                                                       |                       |                          |                       |         |
| <sup>a</sup> For these non-normal distributed variables, the Wilcoxon test was used.                                                                                                                                                                                                                                          |                       |                          |                       |         |
| <sup>b</sup> Body mass index (BMI) was calculated as weight in kilograms divided by height in meters squared. Higher BMI values reflect overweight (≥25) and obesity (≥30).                                                                                                                                                   |                       |                          |                       |         |
| <sup>c</sup> The Montreal Cognitive Assessment (MoCA) is a screening test for mild cognitive dysfunction and has a range of 0 to 30 points, in which higher scores are better and scores greater than 26 suggest normal cognitive function.                                                                                   |                       |                          |                       |         |
| <sup>d</sup> Weekly volume of physical activity was estimated based on the Nurses' Health Study questionnaire on physical activity, in which energy expenditure of different activities in metabolic equivalent tasks (METs) of activities based on the Compendium of Physical Activities were summed over the previous week. |                       |                          |                       |         |

**Table S2. Frequency distribution of frailty over the follow up of DO-HEALTH**

|                                                  | <b>Year 1</b> | <b>Year 2</b> | <b>Year 3</b> |
|--------------------------------------------------|---------------|---------------|---------------|
| <b>Robust, n (%)</b>                             | 839<br>(48.4) | 704<br>(41.8) | 657 (39.8)    |
| <b>Pre-frail (1-2 points), n (%)</b>             | 853<br>(49.2) | 918<br>(54.5) | 931 (56.4)    |
| <b>Frail (<math>\geq 3</math> points), n (%)</b> | 43 (2.5)      | 62 (3.7)      | 63 (3.8)      |

**Table S3. Interaction p-values of the exposure with the subgroup variables of interest.**

|                                                     | <b>Baseline MedDietScore</b> |                    | <b>Change in MedDietScore from baseline (<math>\Delta_{Y3-BL}</math>)</b> |                    |
|-----------------------------------------------------|------------------------------|--------------------|---------------------------------------------------------------------------|--------------------|
|                                                     | <b>frailty</b>               | <b>pre-frailty</b> | <b>frailty</b>                                                            | <b>pre-frailty</b> |
| <b>Sex</b>                                          | 0.7515                       | 0.0826             | 0.9261                                                                    | 0.9577             |
| <b>Age &gt;75 years</b>                             | 0.4124                       | 0.4241             | 0.5889                                                                    | 0.5210             |
| <b>Physical activity level (active vs inactive)</b> | 0.6017                       | 0.9625             | 0.4691                                                                    | 0.2534             |
| <b>BMI &gt; 30</b>                                  | 0.8114                       | 0.6358             | 0.6826                                                                    | 0.1343             |
| <b>Study site</b>                                   | 0.3643                       | 0.2718             | 0.0514                                                                    | 0.2028             |
